# Supplementary material
Source: HighWire-hosted journal article supplement (https://jnnp.bmj.com/content/94/10/835)
Supplement: inline-supplementary-material-3 [file inline-supplementary-material-3.pdf]

### Supplementary material 3. Audit tool

#### Clinical assessment and pathway:

1. At the time of initial assessment, was the patient asked about the postural component of the headache?  
Yes  No
2. What was the time interval from the initial suspicion of spontaneous intracranial hypotension (SIH) to assessment by a neurologist?  
<24 hours  <48 hours  <4 weeks  <3 months  >3 months
3. Was the patient educated or directed to educational resources regarding:  
Bed rest? Yes  No   
Hydration? Yes  No   
Analgesia? Yes  No   
Methods to avoid deconditioning and deep vein thrombosis? Yes  No
4. At what point was the patient referred for multidisciplinary discussion in a specialist neuroscience centre?  
Immediately after SIH was suspected  After 1 epidural blood patch (EBP)   
After 2 EBPs  After >2 EBPs  N/A (not referred)

#### Investigations:

1. What imaging was performed at the first assessment?  
MRI head with contrast  MRI head without contrast   
MRI whole spine  Other (please specify)  \_\_\_\_\_
2. Was the imaging reviewed by a consultant neuroradiologist?  
Yes  No
3. Was lumbar puncture performed?  
Yes, to measure opening pressure  Yes, for other reasons  No

4. For patients with abnormal brain or spine MRI undergoing myelography, how many blood patches had been performed beforehand?

None  1  2  > 2 (specify)  \_\_\_\_\_

5. For patients with a spinal longitudinal epidural collection (SLEC) undergoing myelography, was “dynamic” myelography performed?

Yes  No

6. For patients without a SLEC undergoing myelography, was lateral decubitus myelography performed?

Yes, examining both sides  Yes, one side only  No

**Procedures:**

1. Once diagnosis of SIH was made, how soon was the first non-targeted EBP performed?

<48 hours  <2 weeks  <4 weeks  <3 months  >3 months

2. After EBP was the patient:

Given a point of contact for their clinical team? Yes  No

Contacted at 12-48 hours to enquire about concerning features? Yes  No

How soon was efficacy of EBP assessed?

<10 days  10-14 days  2-4 weeks  4-8 weeks  >8 weeks

3. Once a decision for to operate has been made, how soon was the date of surgery?

<2 weeks  <6 weeks  <3 months  >3 months

4. Was outcome assessed at the following intervals and included in an outcomes database?

6 weeks Yes  No

3 months Yes  No
